# Supplementary material
Source: PubMed Central journal article supplement (PMC8439611)
Supplement: jci-131-140521-s052.pdf [file jci-131-140521-s052.pdf]

| Figure number | Statistical test                                                   | n                                                                                                                                           | P value                                                                                                                                                                                                                                                                                                                                                                                       |
|---------------|--------------------------------------------------------------------|---------------------------------------------------------------------------------------------------------------------------------------------|-----------------------------------------------------------------------------------------------------------------------------------------------------------------------------------------------------------------------------------------------------------------------------------------------------------------------------------------------------------------------------------------------|
|               |                                                                    | Number of samples                                                                                                                           |                                                                                                                                                                                                                                                                                                                                                                                               |
| Figure 1C     | Wilcoxon matched-pair test (two-tailed)                            | 8 cells, 5 mice (Control)<br>8 cells, 5 mice (4-CIN)                                                                                        | $P=0.0078$                                                                                                                                                                                                                                                                                                                                                                                    |
| Figure 1E     | Repeated measures one-way ANOVA followed by Tuckey's post hoc test | 6 cells, 4 mice (Control)<br>6 cells, 4 mice (0 Glc)<br>6 cells, 4 mice (0 Glc + Lactate)                                                   | $P=0.0015$ (Control vs. 0 Glc)<br>$P=0.2007$ (Control vs. 0 Glc + Lactate)<br>$P=0.0280$ (0 Glc vs. 0 Glc + Lactate)                                                                                                                                                                                                                                                                          |
| Figure 1G     | Repeated measures one-way ANOVA followed by Tuckey's post hoc test | 5 cells, 4 mice (Control)<br>5 cells, 4 mice (Oxamate)<br>5 cells, 4 mice (Oxamate+ Lactate)                                                | $P=0.0008$ (Control vs. Oxamate)<br>$P=0.0004$ (Control vs. Oxamate + Lactate)<br>$P=0.7811$ (Oxamate vs. Oxamate + Lactate)                                                                                                                                                                                                                                                                  |
| Figure 1I     | Repeated measures one-way ANOVA followed by Tuckey's post hoc test | 7 cells, 5 mice (Control)<br>7 cells, 5 mice (Oxamate)<br>7 cells, 5 mice (Oxamate + Pyruvate)                                              | $P=0.0277$ (Control vs. Oxamate)<br>$P=0.9561$ (Control vs. Oxamate + Pyruvate)<br>$P=0.0460$ (Oxamate vs. Oxamate + Pyruvate)                                                                                                                                                                                                                                                                |
| Figure 1K     | Repeated measures one-way ANOVA followed by Tuckey's post hoc test | 7 cells, 5 mice (Control)<br>7 cells, 5 mice (Oxamate POMC neuron)<br>7 cells, 5 mice (Oxamate POMC neuron + Pyruvate)                      | $P=0.0236$ (Control vs. Oxamate POMC neuron)<br>$P=0.9603$ (Control vs. Oxamate POMC neuron + Pyruvate)<br>$P=0.0145$ (Oxamate POMC neuron vs. Oxamate POMC neuron + Pyruvate)                                                                                                                                                                                                                |
| Figure 2C     | Ordinary one-way ANOVA followed by Tuckey's post hoc test          | n=6 (Ctrl)<br>n=5 (2-DG)<br>n=6 (4-CIN)<br>n=6 (CBX)                                                                                        | $P=0.0016$ (Ctrl vs 2-DG)<br>$P=0.0120$ (Ctrl vs. 4-CIN)<br>$P=0.0355$ (Ctrl vs. CBX)<br>$P=0.7092$ (2-DG vs. 4-CIN)<br>$P=0.4239$ (2-DG vs. CBX)<br>$P=0.9558$ (4-CIN vs. CBX)                                                                                                                                                                                                               |
| Figure 2D     | Ordinary one-way ANOVA followed by Tuckey's post hoc test          | n=5 (Ctrl)<br>n=5 (2-DG)<br>n=6 (4-CIN)<br>n=6 (CBX)                                                                                        | $P<0.0001$ (Ctrl vs 2-DG)<br>$P<0.0001$ (Ctrl vs. 4-CIN)<br>$P=0.0009$ (Ctrl vs. CBX)<br>$P<0.0001$ (2-DG vs. 4-CIN)<br>$P<0.0001$ (2-DG vs. CBX)<br>$P=0.6091$ (4-CIN vs. CBX)                                                                                                                                                                                                               |
| Figure 2I     | Repeated measures one-way ANOVA followed by Tuckey's post hoc test | 6 cells, 5 mice (Control + Tanycytic lactate)<br>6 cells, 5 mice (0 glc + Tanycytic lactate)<br>6 cells, 5 mice (4-CIN + Tanycytic lactate) | $P=0.9974$ (Control + Tanycytic lactate vs. 0 Glc + Tanycytic lactate)<br>$P=0.0288$ (Control + Tanycytic lactate vs. 4-CIN + Tanycytic lactate)<br>$P=0.0258$ (0 Glc + Tanycytic lactate vs. 4-CIN + Tanycytic lactate)                                                                                                                                                                      |
| Figure 2M     | Repeated measures one-way ANOVA followed by Tuckey's post hoc test | 6 cells, 5 mice (Control)<br>6 cells, 5 mice (Oxamate Tanycytic)<br>6 cells, 5 mice (Oxamate tanycytic + lactate)                           | $P=0.0143$ (Control vs. Oxamate tanycytic)<br>$P=0.9099$ (Control vs. 4-CIN Oxamate tanycytic + Lactate)<br>$P=0.0474$ (Oxamate tanycytic vs. Oxamate tanycytic + Lactate)                                                                                                                                                                                                                    |
| Figure 3B     | Unpaired Student's t-tests (two-tailed)                            | 5 mice (Tanycyte)<br>4 mice (POMC neuron)                                                                                                   | $Mct1: P=0.0009$ (Tanycyte vs. POMC neurons)<br>$Mct2: P=0.0028$ (Tanycyte vs. POMC neurons)<br>$Mct4: P=0.0272$ (Tanycyte vs. POMC neurons)                                                                                                                                                                                                                                                  |
| Figure 3C     | Ordinary one-way ANOVA followed by uncorrected Fisher's LSD        | 4 mice ( $Mct1/4^{TanScramble}$ )<br>4 mice ( $Mct1/4^{TanycyteKD}$ )                                                                       | $P=0.0231$ ( $Mct1/4^{TanScramble}$ positive cells vs. $Mct1/4^{TanycyteKD}$ positive cells)<br>$P=0.8494$ ( $Mct1/4^{TanScramble}$ negative cells vs. $Mct1/4^{TanycyteKD}$ negative cells)<br>$P=0.0037$ ( $Mct1/4^{TanScramble}$ positive cells vs. $Mct1/4^{TanScramble}$ negative cells)<br>$P=0.0053$ ( $Mct1/4^{TanScramble}$ positive cells vs. $Mct1/4^{TanycyteKD}$ negative cells) |
| Figure 3D     | Ordinary one-way ANOVA followed by uncorrected Fisher's LSD        | 4 mice ( $Mct1/4^{TanScramble}$ )<br>4 mice ( $Mct1/4^{TanycyteKD}$ )                                                                       | $P=0.0320$ ( $Mct1/4^{TanScramble}$ positive cells vs. $Mct1/4^{TanycyteKD}$ positive cells)<br>$P=0.8944$ ( $Mct1/4^{TanScramble}$ negative cells vs. $Mct1/4^{TanycyteKD}$ negative cells)<br>$P=0.0415$ ( $Mct1/4^{TanScramble}$ positive cells vs. $Mct1/4^{TanScramble}$ negative cells)<br>$P=0.0324$ ( $Mct1/4^{TanScramble}$ positive cells vs. $Mct1/4^{TanycyteKD}$ negative cells) |

|           |                                                         |                                                                                                                                                                                                                                                                                                                                           |                                                                                                                                                                                                                                                                                                                                                                                                                                                                                                                                                                                                                                                                                                                                                                                                                                           |
|-----------|---------------------------------------------------------|-------------------------------------------------------------------------------------------------------------------------------------------------------------------------------------------------------------------------------------------------------------------------------------------------------------------------------------------|-------------------------------------------------------------------------------------------------------------------------------------------------------------------------------------------------------------------------------------------------------------------------------------------------------------------------------------------------------------------------------------------------------------------------------------------------------------------------------------------------------------------------------------------------------------------------------------------------------------------------------------------------------------------------------------------------------------------------------------------------------------------------------------------------------------------------------------------|
| Figure 3G | Mann-Whitney test (two-tailed)                          | 26 cells, 5 mice ( <i>Mct1/4</i> <sup>TanScramble</sup> )                                                                                                                                                                                                                                                                                 | <i>P</i> =0.0026                                                                                                                                                                                                                                                                                                                                                                                                                                                                                                                                                                                                                                                                                                                                                                                                                          |
| Figure 3H | Unpaired Student's t-test (two-tailed)                  | 26 cells, 5 mice ( <i>Mct1/4</i> <sup>TanScramble</sup> )<br>7 mice ( <i>Mct1/4</i> <sup>TanScramble</sup> )<br>7 mice ( <i>Mct1/4</i> <sup>TanocyteKD</sup> )                                                                                                                                                                            | <i>P</i> =0.03374                                                                                                                                                                                                                                                                                                                                                                                                                                                                                                                                                                                                                                                                                                                                                                                                                         |
| Figure 3I | Two-way ANOVA followed by uncorrected Fisher's LSD test | 6 mice ( <i>Mct1/4</i> <sup>TanScramble</sup> )<br>8 mice ( <i>Mct1/4</i> <sup>TanocyteKD</sup> )                                                                                                                                                                                                                                         | Dark phase: <i>P</i> =0.2454 ; Light phase: <i>P</i> =0.8866 ; Mean: <i>P</i> =0.360                                                                                                                                                                                                                                                                                                                                                                                                                                                                                                                                                                                                                                                                                                                                                      |
| Figure 3J | Perason correlation                                     | 7 mice ( <i>Mct1/4</i> <sup>TanScramble</sup> )<br>7 mice ( <i>Mct1/4</i> <sup>TanocyteKD</sup> )                                                                                                                                                                                                                                         | <i>P</i> =0.0378 ( <i>Mct1/4</i> <sup>TanScramble</sup> )<br><i>P</i> =0.5351 ( <i>Mct1/4</i> <sup>TanocyteKD</sup> )                                                                                                                                                                                                                                                                                                                                                                                                                                                                                                                                                                                                                                                                                                                     |
| Figure 3K | Perason correlation                                     | 7 mice ( <i>Mct1/4</i> <sup>TanScramble</sup> )<br>7 mice ( <i>Mct1/4</i> <sup>TanocyteKD</sup> )                                                                                                                                                                                                                                         | <i>P</i> =0.0084 ( <i>Mct1/4</i> <sup>Scramble</sup> )<br><i>P</i> =0.2553 ( <i>Mct1/4</i> <sup>TanocyteKD</sup> )                                                                                                                                                                                                                                                                                                                                                                                                                                                                                                                                                                                                                                                                                                                        |
| Figure 3L | Two-way ANOVA followed by uncorrected Fisher's LSD test | 7 mice ( <i>Mct1/4</i> <sup>TanScramble</sup> )<br>8 mice ( <i>Mct1/4</i> <sup>TanocyteKD</sup> )                                                                                                                                                                                                                                         | Dark phase: <i>P</i> =0.0012 ; Light phase: <i>P</i> =0.3476 ; Mean: <i>P</i> =0.0324                                                                                                                                                                                                                                                                                                                                                                                                                                                                                                                                                                                                                                                                                                                                                     |
| Figure 3M | Two-way ANOVA followed by uncorrected Fisher's LSD test | 5 mice ( <i>Mct1/4</i> <sup>TanScramble</sup> )<br>7 mice ( <i>Mct1/4</i> <sup>TanocyteKD</sup> )                                                                                                                                                                                                                                         | Dark phase: <i>P</i> =0.0459 ; Light phase: <i>P</i> =0.3042 ;Mean: <i>P</i> =0.0037                                                                                                                                                                                                                                                                                                                                                                                                                                                                                                                                                                                                                                                                                                                                                      |
| Figure 3N | Two-way ANOVA followed by uncorrected Fisher's LSD test | 5 mice ( <i>Mct1/4</i> <sup>TanScramble</sup> )<br>7 mice ( <i>Mct1/4</i> <sup>TanocyteKD</sup> )                                                                                                                                                                                                                                         | Dark phase: <i>P</i> =0.0307 ; Light phase: <i>P</i> =0.5919 ;Mean: <i>P</i> =0.1018                                                                                                                                                                                                                                                                                                                                                                                                                                                                                                                                                                                                                                                                                                                                                      |
| Figure 4C | Wilcoxon matched-pair test (two-tailed)                 | 6 cells, 4 mice (Control)<br>6 cells, 4 mice (CBX)                                                                                                                                                                                                                                                                                        | <i>P</i> =0.0312                                                                                                                                                                                                                                                                                                                                                                                                                                                                                                                                                                                                                                                                                                                                                                                                                          |
| Figure 4E | Wilcoxon matched-pair test (two-tailed)                 | 5 cells, 4 mice (Control)<br>5 cells, 4 mice (CBX + Lactate)                                                                                                                                                                                                                                                                              | <i>P</i> =0.6250                                                                                                                                                                                                                                                                                                                                                                                                                                                                                                                                                                                                                                                                                                                                                                                                                          |
| Figure 4G | Unpaired Student's t-tests (two-tailed)                 | 6 mice ( <i>Cx43</i> <sup>+/+</sup> <i>tdTomato</i> )<br>6 mice ( <i>Cx43</i> <sup>TanocyteKO</sup> <i>tdTomato</i> )                                                                                                                                                                                                                     | <i>P</i> =0.0449 ( <i>Cx43</i> <sup>+/+</sup> <i>tdTomato</i> / Tomato positive vs. <i>Cx43</i> <sup>TanocyteKO</sup> <i>tdTomato</i> / Tomato positive)<br><i>P</i> =0.8611 ( <i>Cx43</i> <sup>+/+</sup> <i>tdTomato</i> /Tomato negative vs. <i>Cx43</i> <sup>TanocyteKO</sup> <i>tdTomato</i> /Tomato negative)                                                                                                                                                                                                                                                                                                                                                                                                                                                                                                                        |
| Figure 4I | Unpaired Student's t-test (two-tailed)                  | 5 cells, 2 mice ( <i>Cx43</i> <sup>loxP/loxP</sup> )<br>10 cells, 4 mice ( <i>Cx43</i> <sup>TanocyteKO</sup> )                                                                                                                                                                                                                            | <i>P</i> =0.0011                                                                                                                                                                                                                                                                                                                                                                                                                                                                                                                                                                                                                                                                                                                                                                                                                          |
| Figure 4L | Mann-Whitney test (two-tailed)                          | 6 cells, 5 mice ( <i>Cx43</i> <sup>loxP/loxP</sup> ; <i>tdTomato</i> <sup>POMC</sup> )<br>5 cells, 4 mice ( <i>Cx43</i> <sup>TanocyteKO</sup> ; <i>tdTomato</i> <sup>POMC</sup> )                                                                                                                                                         | <i>P</i> =0.0043                                                                                                                                                                                                                                                                                                                                                                                                                                                                                                                                                                                                                                                                                                                                                                                                                          |
| Figure 4N | Wilcoxon matched-pair test (two-tailed)                 | 6 cells, 5 mice ( <i>Cx43</i> <sup>TanocyteKO</sup> ; <i>tdTomato</i> <sup>POMC</sup> - Control)<br>6 cells, 5 mice ( <i>Cx43</i> <sup>TanocyteKO</sup> ; <i>tdTomato</i> <sup>POMC</sup> - Lactate)                                                                                                                                      | <i>P</i> =0.0312                                                                                                                                                                                                                                                                                                                                                                                                                                                                                                                                                                                                                                                                                                                                                                                                                          |
| Figure 5C | Two-way ANOVA followed by uncorrected Fisher's LSD test | Basal: 6 mice ( <i>Cx43</i> <sup>loxP/loxP</sup> ) and 10 mice ( <i>Cx43</i> <sup>TanocyteKO</sup> )<br>1 - 4 (Saline): 6 mice ( <i>Cx43</i> <sup>loxP/loxP</sup> ) and 10 mice ( <i>Cx43</i> <sup>TanocyteKO</sup> )<br>1-7 (Glucose 20%): 6 mice ( <i>Cx43</i> <sup>loxP/loxP</sup> ) and 10 mice ( <i>Cx43</i> <sup>TanocyteKO</sup> ) | <i>P</i> <0.0001 (Time factor)<br><i>P</i> <0.0001 (Column factor)<br><i>P</i> =0.1326 (Time factor x Column factor)                                                                                                                                                                                                                                                                                                                                                                                                                                                                                                                                                                                                                                                                                                                      |
|           | Unpaired Student's t-test (two-tailed)                  | 6 mice ( <i>Cx43</i> <sup>loxP/loxP</sup> ) and 10 mice ( <i>Cx43</i> <sup>TanocyteKO</sup> )                                                                                                                                                                                                                                             | <i>P</i> =0.0130                                                                                                                                                                                                                                                                                                                                                                                                                                                                                                                                                                                                                                                                                                                                                                                                                          |
| Figure 5D | Unpaired Student's t-tests (two-tailed)                 | 6 mice ( <i>Cx43</i> <sup>+/+</sup> <i>tdTomato</i> )<br>6 mice ( <i>Cx43</i> <sup>TanocyteKO</sup> <i>tdTomato</i> )                                                                                                                                                                                                                     | <i>Mct1</i> : <i>P</i> =0.2001 ( <i>Cx43</i> <sup>+/+</sup> <i>tdTomato</i> vs. <i>Cx43</i> <sup>TanocyteKO</sup> <i>tdTomato</i> )<br><i>Mct4</i> : <i>P</i> =0.3336 ( <i>Cx43</i> <sup>+/+</sup> <i>tdTomato</i> vs. <i>Cx43</i> <sup>TanocyteKO</sup> <i>tdTomato</i> )<br><i>Ldha</i> : <i>P</i> = 0.9195 ( <i>Cx43</i> <sup>+/+</sup> <i>tdTomato</i> vs. <i>Cx43</i> <sup>TanocyteKO</sup> <i>tdTomato</i> )<br><i>Ldhb</i> : <i>P</i> =0.0119 ( <i>Cx43</i> <sup>+/+</sup> <i>tdTomato</i> vs. <i>Cx43</i> <sup>TanocyteKO</sup> <i>tdTomato</i> )<br><i>Glut1</i> : <i>P</i> =0.9195 ( <i>Cx43</i> <sup>+/+</sup> <i>tdTomato</i> vs. <i>Cx43</i> <sup>TanocyteKO</sup> <i>tdTomato</i> )<br><i>Glut2</i> : <i>P</i> =0.0071 ( <i>Cx43</i> <sup>+/+</sup> <i>tdTomato</i> vs. <i>Cx43</i> <sup>TanocyteKO</sup> <i>tdTomato</i> ) |
| Figure 5E | Unpaired Student's t-test (two-tailed)                  | 7 mice ( <i>Cx43</i> <sup>loxP/loxP</sup> )<br>9 mice ( <i>Cx43</i> <sup>TanocyteKO</sup> )                                                                                                                                                                                                                                               | <i>P</i> =0.0428                                                                                                                                                                                                                                                                                                                                                                                                                                                                                                                                                                                                                                                                                                                                                                                                                          |

|            |                                                         |                                                                                                                                                 |                                                                                                                                                                                                                                                                                                                                                                                                                    |
|------------|---------------------------------------------------------|-------------------------------------------------------------------------------------------------------------------------------------------------|--------------------------------------------------------------------------------------------------------------------------------------------------------------------------------------------------------------------------------------------------------------------------------------------------------------------------------------------------------------------------------------------------------------------|
| Figure 5F  | Paired Student's t-test (two-tailed)                    | $Cx43^{loxP/loxP}$ : 9 mice (day 0) and 9 mice (day 10)<br>$Cx43^{TanycteKO}$ : 9 mice (day 0) and 9 mice (day 10)                              | $P=0.2103$ ( $Cx43^{loxP/loxP}/d0$ vs. $Cx43^{loxP/loxP}/d10$ )<br>$P=0.0075$ ( $Cx43^{TanycteKO}/d0$ vs. $Cx43^{TanycteKO}/d10$ )                                                                                                                                                                                                                                                                                 |
|            | Unpaired Student's t-test (two-tailed)                  |                                                                                                                                                 | $P=0.7400$ ( $Cx43^{loxP/loxP}/d0$ vs. $Cx43^{TanycteKO}/d0$ )<br>$P=0.0121$ ( $Cx43^{loxP/loxP}/d10$ vs. $Cx43^{TanycteKO}/d10$ )                                                                                                                                                                                                                                                                                 |
| Figure 5G  | Unpaired Student's t-test (two-tailed)                  | 8 mice ( $Cx43^{loxP/loxP}$ )<br>9 mice ( $Cx43^{TanycteKO}$ )                                                                                  | $P=0.0287$                                                                                                                                                                                                                                                                                                                                                                                                         |
| Figure 5H  | Mann-Whitney test (two-tailed)                          | 8 mice ( $Cx43^{loxP/loxP}$ )<br>9 mice ( $Cx43^{TanycteKO}$ )                                                                                  | $P=0.1139$                                                                                                                                                                                                                                                                                                                                                                                                         |
| Figure 5I  | Two-way ANOVA followed by uncorrected Fisher's LSD test | 18h - 17h: 7 mice (before TAT-Cre) and 7 mice (6 days after TAT-Cre)                                                                            | $P<0.0001$ (Time factor)<br>$P=0.0206$ (Column factor)<br>$P=0.0001$ (Time factor x column factor)                                                                                                                                                                                                                                                                                                                 |
| Figure 5J  | Two-way ANOVA followed by uncorrected Fisher's LSD test | 14h - 13h: 7 mice (before TAT-Cre) and 7 mice (6 days after TAT-Cre)                                                                            | $P<0.0001$ (Time factor)<br>$P=0.0037$ (Column factor)<br>$P<0.0001$ (Time factor x column factor)                                                                                                                                                                                                                                                                                                                 |
| Figure 5K  | Two-way ANOVA followed by uncorrected Fisher's LSD test | 14h - 13h: 7 mice (before TAT-Cre) and 7 mice (6 days after TAT-Cre)                                                                            | $P<0.0001$ (Time factor)<br>$P=0.1704$ (Column factor)<br>$P<0.0001$ (Time factor x column factor)                                                                                                                                                                                                                                                                                                                 |
| Figure 5L  | Two-way ANOVA followed by uncorrected Fisher's LSD test | 14h - 13h: 7 mice (before TAT-Cre) and 7 mice (6 days after TAT-Cre)                                                                            | $P<0.0001$ (Time factor)<br>$P=0.0002$ (Column factor)<br>$P=0.0147$ (Time factor x column factor)                                                                                                                                                                                                                                                                                                                 |
| Figure 5M  | Unpaired Student's t-tests (two-tailed)                 | Dark phase: 7 mice (before TAT-Cre) and 7 mice (6 days after TAT-Cre)<br>Light phase: 7 mice (before TAT-Cre) and 7 mice (6 days after TAT-Cre) | Dark phase: $P=0.0261$ (Before TAT-Cre vs. 6 days after TAT-Cre)<br>Light phase: $P=0.0394$ (Before TAT-Cre vs. after TAT-Cre)                                                                                                                                                                                                                                                                                     |
| Figure 5N  | Unpaired Student's t-tests (two-tailed)                 | 6 mice ( $Cx43^{+/+};tdTomato$ )<br>6 mice ( $Cx43^{TanycteKO};tdTomato$ )                                                                      | $Mct2$ : $P=0.7581$ ( $Cx43^{+/+};tdTomato$ vs. $Cx43^{TanycteKO};tdTomato$ )<br>$Cartpt$ : $P=0.4184$ ( $Cx43^{+/+};tdTomato$ vs. $Cx43^{TanycteKO};tdTomato$ )<br>$Pomc$ : $P=0.6335$ ( $Cx43^{+/+};tdTomato$ vs. $Cx43^{TanycteKO};tdTomato$ )<br>$Agrp$ : $P=0.4722$ ( $Cx43^{+/+};tdTomato$ vs. $Cx43^{TanycteKO};tdTomato$ )<br>$Npy$ : $P=0.0492$ ( $Cx43^{+/+};tdTomato$ vs. $Cx43^{TanycteKO};tdTomato$ ) |
| Figure S2C | Unpaired Student's t-tests (two-tailed)                 | 4 mice (Tomato Positive)<br>4 mice (Tomato Negative)                                                                                            | $Pomc$ : $P=0.071$ (Tomato Positive vs. Tomato Negative)<br>$Darpp32$ : $P=0.158$ (Tomato Positive vs. Tomato Negative)<br>$Gpr50$ : $P=0.319$ (Tomato Positive vs. Tomato Negative)<br>$HuC$ : $P=0.027$ (Tomato Positive vs. Tomato Negative)                                                                                                                                                                    |
| Figure S2F | Unpaired Student's t-tests (two-tailed)                 | 5 mice (GFP Positive)<br>5 mice (GFP Negative)                                                                                                  | $Darpp32$ : $P<0.001$ (GFP Positive vs. GFP Negative)<br>$Gpr50$ : $P=0.001$ (GFP Positive vs. GFP Negative)<br>$Pomc$ : $P=0.06$ (GFP Positive vs. GFP Negative)<br>$HuC$ : $P=0.07$ (GFP Positive vs. GFP Negative)                                                                                                                                                                                              |
| Figure S3B | Unpaired Student's t-tests (two-tailed)                 | 7 mice ( $Mct2^{POMCScrambled}$ )<br>6 mice ( $Mct2^{PomcKD}$ )                                                                                 | $P=0.0003$ (Week 1)<br>$P=0.0018$ (Week 2)<br>$P=0.0045$ (Week 3)<br>$P=0.0008$ (Week 4)                                                                                                                                                                                                                                                                                                                           |

|            |                                                         |                                                                                                                                                                                                    |                                                                                                                                                                                                                                                                                                                                                                                                                                                                                                                                                                                                                                                                                                                                                                                                                                                                   |
|------------|---------------------------------------------------------|----------------------------------------------------------------------------------------------------------------------------------------------------------------------------------------------------|-------------------------------------------------------------------------------------------------------------------------------------------------------------------------------------------------------------------------------------------------------------------------------------------------------------------------------------------------------------------------------------------------------------------------------------------------------------------------------------------------------------------------------------------------------------------------------------------------------------------------------------------------------------------------------------------------------------------------------------------------------------------------------------------------------------------------------------------------------------------|
| Figure S3C | Unpaired Student's t-tests (two-tailed)                 | 7 mice ( <i>Mct2</i> <sup>POMCScrambled</sup> )<br>6 mice ( <i>Mct2</i> <sup>POMCKD</sup> )                                                                                                        | <i>P</i> =0.1135 (Week 1)<br><i>P</i> =0.0534 (Week 2)<br><i>P</i> =0.5188 (Week 3)<br><i>P</i> =0.7470 (Week 4)<br><i>P</i> =0.8773 (Week 5)                                                                                                                                                                                                                                                                                                                                                                                                                                                                                                                                                                                                                                                                                                                     |
| Figure S4A | Unpaired Student's t-tests (two-tailed)                 | 4 mice ( <i>Mct1/4</i> <sup>TanScramble</sup> )<br>4 mice ( <i>Mct1/4</i> <sup>TanocyteKD</sup> )                                                                                                  | <i>P</i> =0.0200 ( <i>Mct1/4</i> <sup>TanScramble</sup> positive cells vs. <i>Mct1/4</i> <sup>TanScramble</sup> negative cells)<br><i>P</i> =0.0134 ( <i>Mct1/4</i> <sup>TanocyteKD</sup> positive cells vs. <i>Mct1/4</i> <sup>TanocyteKD</sup> negative cells)                                                                                                                                                                                                                                                                                                                                                                                                                                                                                                                                                                                                  |
| Figure S4B | Unpaired Student's t-tests (two-tailed)                 | 4 mice ( <i>Mct1/4</i> <sup>TanScramble</sup> )<br>4 mice ( <i>Mct1/4</i> <sup>TanocyteKD</sup> )                                                                                                  | <i>P</i> =0.0037 ( <i>Mct1/4</i> <sup>TanScramble</sup> positive cells vs. <i>Mct1/4</i> <sup>TanScramble</sup> negative cells)<br><i>P</i> =0.0324 ( <i>Mct1/4</i> <sup>TanocyteKD</sup> positive cells vs. <i>Mct1/4</i> <sup>TanocyteKD</sup> negative cells)                                                                                                                                                                                                                                                                                                                                                                                                                                                                                                                                                                                                  |
| Figure S4C | Unpaired Student's t-tests (two-tailed)                 | 4 mice ( <i>Mct1/4</i> <sup>TanScramble</sup> )<br>4 mice ( <i>Mct1/4</i> <sup>TanocyteKD</sup> )                                                                                                  | <i>Mct2</i> : <i>P</i> =0.8204 ( <i>Mct1/4</i> <sup>TanScramble</sup> vs. <i>Mct1/4</i> <sup>TanocyteKD</sup> )<br><i>Ldha</i> : <i>P</i> =0.5561 ( <i>Mct1/4</i> <sup>TanScramble</sup> vs. <i>Mct1/4</i> <sup>TanocyteKD</sup> )<br><i>Ldhb</i> : <i>P</i> = 0.5457 ( <i>Mct1/4</i> <sup>TanScramble</sup> vs. <i>Mct1/4</i> <sup>TanocyteKD</sup> )<br><i>Gck</i> : <i>P</i> =0.1381 ( <i>Mct1/4</i> <sup>TanScramble</sup> vs. <i>Mct1/4</i> <sup>TanocyteKD</sup> )<br><i>Glut1</i> : <i>P</i> =0.2479 ( <i>Mct1/4</i> <sup>TanScramble</sup> vs. <i>Mct1/4</i> <sup>TanocyteKD</sup> )<br><i>Glut4</i> : <i>P</i> = 0.9174 ( <i>Mct1/4</i> <sup>TanScramble</sup> vs. <i>Mct1/4</i> <sup>TanocyteKD</sup> )<br><i>Cx30</i> : <i>P</i> =0.7825 ( <i>Mct1/4</i> <sup>TanScramble</sup> vs. <i>Mct1/4</i> <sup>TanocyteKD</sup> )                              |
| Figure S4D | Two-way ANOVA followed by uncorrected Fisher's LSD test | 20h - 19h: 6 <i>Mct1/4</i> <sup>TanScramble</sup> mice and 8 <i>Mct1/4</i> <sup>TanocyteKD</sup> mice                                                                                              | <i>P</i> <0.0001 (Time factor)<br><i>P</i> =0.2310 (Column factor)<br><i>P</i> =0.9890 (Time factor x column factor)                                                                                                                                                                                                                                                                                                                                                                                                                                                                                                                                                                                                                                                                                                                                              |
| Figure S4E | Two-way ANOVA followed by uncorrected Fisher's LSD test | 20h - 19h: 7 <i>Mct1/4</i> <sup>TanScramble</sup> mice and 8 <i>Mct1/4</i> <sup>TanocyteKD</sup> mice                                                                                              | <i>P</i> <0.0001 (Time factor)<br><i>P</i> =0.2308 (Column factor)<br><i>P</i> =0.3695 (Time factor x column factor)                                                                                                                                                                                                                                                                                                                                                                                                                                                                                                                                                                                                                                                                                                                                              |
| Figure S4F | Two-way ANOVA followed by uncorrected Fisher's LSD test | 20h - 19h: 7 <i>Mct1/4</i> <sup>TanScramble</sup> mice and 8 <i>Mct1/4</i> <sup>TanocyteKD</sup> mice                                                                                              | <i>P</i> <0.0001 (Time factor)<br><i>P</i> =0.5215 (Column factor)<br><i>P</i> =0.6883 (Time factor x column factor)                                                                                                                                                                                                                                                                                                                                                                                                                                                                                                                                                                                                                                                                                                                                              |
| Figure S4G | Two-way ANOVA followed by uncorrected Fisher's LSD test | 20h - 19h: 7 <i>Mct1/4</i> <sup>TanScramble</sup> mice and 8 <i>Mct1/4</i> <sup>TanocyteKD</sup> mice                                                                                              | <i>P</i> <0.0001 (Time factor)<br><i>P</i> =0.0305 (Column factor)<br><i>P</i> =0.0034 (Time factor x column factor)                                                                                                                                                                                                                                                                                                                                                                                                                                                                                                                                                                                                                                                                                                                                              |
| Figure S5D | Mann-Whitney test                                       | 5 cells, 4 mice (WT)<br>7 cells, 5 mice (WT+CBX)                                                                                                                                                   | <i>P</i> =0.0025                                                                                                                                                                                                                                                                                                                                                                                                                                                                                                                                                                                                                                                                                                                                                                                                                                                  |
| Figure S5K | Mann-Whitney test                                       | 7 cells, 6 mice ( <i>Cx43</i> <sup>loxP/loxP</sup> )<br>7 cells, 6 mice ( <i>Cx43</i> <sup>TanocyteKO</sup> )                                                                                      | <i>P</i> =0.0006                                                                                                                                                                                                                                                                                                                                                                                                                                                                                                                                                                                                                                                                                                                                                                                                                                                  |
| Figure S5M | Paired Student's t test (two-tailed)                    | 6 cells, 6 mice ( <i>Cx43</i> <sup>loxP/loxP</sup> ; <i>tdTomato</i> <sup>POMC</sup> - Control)<br>6 cells, 6 mice ( <i>Cx43</i> <sup>loxP/loxP</sup> ; <i>tdTomato</i> <sup>POMC</sup> - Lactate) | <i>P</i> =0.6042                                                                                                                                                                                                                                                                                                                                                                                                                                                                                                                                                                                                                                                                                                                                                                                                                                                  |
| Figure S6D | Unpaired Student's t-tests (two-tailed)                 | 6 mice ( <i>Cx43</i> <sup>+/+</sup> ; <i>tdTomato</i> )<br>6 mice ( <i>Cx43</i> <sup>TanocyteKO</sup> ; <i>tdTomato</i> )                                                                          | <i>P</i> =0.0070 ( <i>Cx43</i> <sup>+/+</sup> ; <i>tdTomato</i> / Tomato Positive vs. <i>Cx43</i> <sup>+/+</sup> ; <i>tdTomato</i> /Tomato Negative)<br><i>P</i> =0.0056 ( <i>Cx43</i> <sup>TanocyteKO</sup> ; <i>tdTomato</i> / Tomato Positive vs. <i>Cx43</i> <sup>TanocyteKO</sup> ; <i>tdTomato</i> / Tomato Negative)                                                                                                                                                                                                                                                                                                                                                                                                                                                                                                                                       |
| Figure S6E | Unpaired Student's t-tests (two-tailed)                 | 6 mice ( <i>Cx43</i> <sup>+/+</sup> ; <i>tdTomato</i> )<br>6 mice ( <i>Cx43</i> <sup>TanocyteKO</sup> ; <i>tdTomato</i> )                                                                          | <i>Mct1</i> : <i>P</i> =0.5679 ( <i>Cx43</i> <sup>+/+</sup> ; <i>tdTomato</i> vs. <i>Cx43</i> <sup>TanocyteKO</sup> ; <i>tdTomato</i> )<br><i>Mct4</i> : <i>P</i> =0.6651 ( <i>Cx43</i> <sup>+/+</sup> ; <i>tdTomato</i> vs. <i>Cx43</i> <sup>TanocyteKO</sup> ; <i>tdTomato</i> )<br><i>Ldha</i> : <i>P</i> = 0.8780 ( <i>Cx43</i> <sup>+/+</sup> ; <i>tdTomato</i> vs. <i>Cx43</i> <sup>TanocyteKO</sup> ; <i>tdTomato</i> )<br><i>Ldhb</i> : <i>P</i> =0.5127 ( <i>Cx43</i> <sup>+/+</sup> ; <i>tdTomato</i> vs. <i>Cx43</i> <sup>TanocyteKO</sup> ; <i>tdTomato</i> )<br><i>Glut1</i> : <i>P</i> >0.9999 ( <i>Cx43</i> <sup>+/+</sup> ; <i>tdTomato</i> vs. <i>Cx43</i> <sup>TanocyteKO</sup> ; <i>tdTomato</i> )<br><i>Glut2</i> : <i>P</i> =0.5127 ( <i>Cx43</i> <sup>+/+</sup> ; <i>tdTomato</i> vs. <i>Cx43</i> <sup>TanocyteKO</sup> ; <i>tdTomato</i> ) |
